# Supplementary material for: TMT-Based Quantitative Proteomic Analysis Identification of Integrin Alpha 3 and Integrin Alpha 5 as Novel Biomarkers in Pathogenesis of Acute Aortic Dissection
Source: Biomed Res Int. 2020 Jul 2;2020:1068402. doi: 10.1155/2020/1068402 (PMC7441460; doi:10.1155/2020/1068402)
Supplement: Supplementary 1 — Supplementary Table 1 Basic data between AAD patients and healthy control in the TMT method. Note: a“0” is no; “1” is yes. bAccording to the more popular Stanford system, dissections involving the ascending aorta are classified as type A, whereas those involving only the descending aorta are classified as type B. [file 1068402.f1.xlsx]

## Sheet: Sheet1
Supplementary Table 1
Characteristics	Health 1	Patient 1	Patient 2	Patient 3	Patient 4	Patient 5
Age	44	63	58	22	41	46
Gender	male	male	male	male	male	female
AADa	0	1	1	1	1	1
Standfordb		A	A	A	A	A
Marfan syndromea		0	0	0	0	1
Hypertensionaa	0	1	1	0	1	0
Intimal tearsa	0	1	1	1	1	1
Pathology
Fibrosisa		1	1	1	1	1
Myxoid degenerationa		1	1	1	1	1
