# Supplementary material for: TMT-Based Quantitative Proteomic Analysis Identification of Integrin Alpha 3 and Integrin Alpha 5 as Novel Biomarkers in Pathogenesis of Acute Aortic Dissection
Source: Biomed Res Int. 2020 Jul 2;2020:1068402. doi: 10.1155/2020/1068402 (PMC7441460; doi:10.1155/2020/1068402)
Supplement: Supplementary 2 — Supplementary Table 2 List of expreesion of all identified proteins between the two groups in the TMT method. [file 1068402.f2.xlsx]

## Sheet: Sheet1
Supplementary Table 2
Accession	Expression of healthy donor	Mean expression of AAD patients (n=5)	log2 FC	Description
Q14315	324.67	7870.9	4.59948	Filamin-C
Q5U0D2	204	3628.78	4.15285	Transgelin
P37802	2044.82	28287.8	3.79014	Transgelin-2
B0AZV6	471.5	5283.69	3.48622	cDNA, FLJ79546, highly similar to SH3 domain-binding glutamic acid-rich-likeprotein
J3KND3	180	1960.68	3.44529	Myosin light polypeptide 6
A8KAH9	565	6078.1	3.4273	RAP1A, member of RAS oncogene family
A0A024QZQ2	267	2674.5	3.32436	Prosaposin (Variant Gaucher disease and variant metachromatic leukodystrophy), isoform CRA_b
A0A024RAB6	368.77	3658.2	3.31034	Heparan sulfate proteoglycan 2 (Perlecan), isoform CRA_b
P08294	718	6862.38	3.25665	Extracellular superoxide dismutase [Cu-Zn]
F2RM37	315.5	2933.17	3.21675	Coagulation factor IX
A0A024R321	236.44	2162.79	3.19334	Filamin B, beta (Actin binding protein 278), isoform CRA_a
B4DHX4	241.5	2181.67	3.17534	cDNA FLJ52902, highly similar to Rab GDP dissociation inhibitor alpha
A6NIZ1	565	5073.77	3.16674	Ras-related protein Rap-1b-like protein
A0A024QZX3	180	1546.58	3.10302	Serpin peptidase inhibitor, clade B (Ovalbumin), member 6, isoform CRA_a
Q53HQ0	270	2227.7	3.04452	Flotillin 1 variant (Fragment)
A6NLG9	252.8	2077.26	3.03861	cDNA FLJ36740 fis, clone UTERU2013322, highly similar to Biglycan
A5YM53	229	1812.19	2.98431	ITGAV protein
V9HWF6	287.5	2256.26	2.9723	Alpha-1-acid glycoprotein
B2RDY9	190	1426.92	2.90883	Adenylyl cyclase-associated protein
B4DLV7	311.17	2185.6	2.81226	cDNA FLJ60299, highly similar to Rab GDP dissociation inhibitor beta
P01031	461	3067.17	2.73407	Complement C5
Q9NZM1	201	1334.33	2.73085	Myoferlin
P13645	870.5	5446.79	2.64549	Keratin, type I cytoskeletal 10
P08779	1462.67	8870.31	2.60038	Keratin, type I cytoskeletal 16
B1N7B8	201	1028.06	2.35466	Cryocrystalglobulin CC1 kappa light chain variable region (Fragment)
A0A024RBX9	256	1281.3	2.32339	Pyruvate dehydrogenase E1 component subunit alpha
Q7Z7J6	241.25	1205.77	2.32136	Actin alpha 1 skeletal muscle protein
B7Z6P1	266.05	1306.06	2.29545	cDNA FLJ53662, highly similar to Actin, alpha skeletal muscle
A8K4W0	347	1656.5	2.25513	40S ribosomal protein S3a
A0A024R821	451	1989.75	2.14139	Eukaryotic translation initiation factor 3 subunit B
P07357	947	4078	2.10643	Complement component C8 alpha chain
G3V4G1	274	1140	2.05679	Neuroguidin (Fragment)
P04040	343	1288.68	1.90962	Catalase
A6NH36	1811	6692	1.88565	40S ribosomal protein S4, X isoform
B4DDF8	183	669.14	1.87046	cDNA FLJ51786, highly similar to Retinal dehydrogenase 1 (EC 1.2.1.36)
A0A087X054	206.67	735.014	1.83044	Hypoxia up-regulated protein 1
A5Z217	912.33	3221.55	1.82013	Mutant desmin
P35908	194	642.906	1.72855	Keratin, type II cytoskeletal 2 epidermal
Q13707	368.26	1211.59	1.7181	ACTA2 protein (Fragment)
P06899	204	668.375	1.71209	Histone H2B type 1-J
A0A087WXS7	274	895.833	1.70905	ATPase ASNA1
P12110	268.5	876.922	1.70753	Collagen alpha-2(VI) chain
K7ELW0	815	2474.78	1.60243	Protein deglycase DJ-1
Q16270	270	819.5	1.60178	Insulin-like growth factor-binding protein 7
A0A024RAZ7	166	496.367	1.58022	Heterogeneous nuclear ribonucleoprotein A1, isoform CRA_b
A8K3H8	329	970.64	1.56085	cDNA FLJ77680, highly similar to Homo sapiens protein phosphatase 2 (formerly 2A), regulatory subunit A (PR 65), alpha isoform (PPP2R1A), mRNA
Q6FI13	284	823.938	1.53664	Histone H2A type 2-A
P02533	3827	11080.7	1.53377	Keratin, type I cytoskeletal 14
Q0ZCJ4	471.5	1364.66	1.53322	Immunglobulin heavy chain variable region (Fragment)
P02792	193.17	546.642	1.50073	Ferritin light chain
E9PJD9	204	569	1.47986	60S ribosomal protein L27a
B3KXN4	769	2091.49	1.44347	cDNA FLJ45763 fis, clone N1ESE2000698, highly similar to WD repeat protein 1
A0A0D9SFB0	173	464.73	1.42562	Four and a half LIM domains protein 1 (Fragment)
A8K8U1	204.5	547.676	1.42122	cDNA FLJ77762, highly similar to Homo sapiens cullin-associated and neddylation-dissociated 1 (CAND1), mRNA
W0UV28	723	1906.75	1.39905	Ribonuclease A A1
A0A024RCZ1	312	812	1.37993	LEM domain containing 2, isoform CRA_a
B0YJC4	786.16	2028.75	1.36769	Vimentin
B2R5T5	209	533.412	1.35175	Protein kinase, cAMP-dependent, regulatory, type I, alpha (Tissue specific extinguisher 1), isoform CRA_a
E9PIE3	4844	12021	1.31129	Protein kinase C delta-binding protein
M0R261	430	1062.22	1.30467	6-phosphogluconolactonase (Fragment)
B3KX20	256	626.03	1.29009	cDNA FLJ44510 fis, clone UTERU3001652, highly similar to Leiomodin-1
A0A024RDT4	290.25	702.524	1.27525	Lymphocyte cytosolic protein 1 (L-plastin), isoform CRA_a
A0A024RAA7	995.5	2394.23	1.26607	Complement component 1, q subcomponent, C chain, isoform CRA_a
A0A024R319	240.5	575.834	1.25962	Laminin, beta 2 (Laminin S), isoform CRA_a
A8K3K1	435.39	1039.06	1.2549	cDNA FLJ78096, highly similar to Homo sapiens actin, alpha, cardiac muscle (ACTC), mRNA
P45974	197	462.29	1.2306	Ubiquitin carboxyl-terminal hydrolase 5
V9HWB9	465	1026.71	1.14272	L-lactate dehydrogenase
B4E1T1	194	419.688	1.11326	cDNA FLJ54081, highly similar to Keratin, type II cytoskeletal 5
A0A0A0MSS8	209.5	453	1.11256	Aldo-keto reductase family 1 member C3
Q5U077	418	898.866	1.1046	L-lactate dehydrogenase
H6VRF8	330.33	708.928	1.10173	Keratin 1
P60891	235	500.168	1.08975	Ribose-phosphate pyrophosphokinase 1
A6NML8	197	419.125	1.08918	Diaphanous homolog 2 (Drosophila), isoform CRA_c
A8K8U3	381	810.1	1.08831	Calcium-transporting ATPase
B7Z722	2175	4607.72	1.08304	Tropomyosin 1 (Alpha), isoform CRA_i
B4DMB5	704	1462.73	1.05502	CTP synthase
Q09666	822	1707.72	1.05486	Neuroblast differentiation-associated protein AHNAK
P04259	201	413.12	1.03937	Keratin, type II cytoskeletal 6B
Q5TZZ9	496.44	1019.58	1.03829	Annexin
Q13740	465	949.334	1.02969	CD166 antigen
A0A087X0I4	218	433	0.990039	Coatomer subunit epsilon
B2R657	416	824.466	0.986876	Annexin
V9HWF4	454	879.616	0.954182	Phosphoglycerate kinase
B4DQR8	374.5	720.734	0.944501	cDNA FLJ53160, highly similar to Zyxin
G3XAI2	364	693.167	0.929264	Laminin subunit beta-1
Q14643	204	381.667	0.903744	Inositol 1,4,5-trisphosphate receptor type 1
B4DHT9	1693	3136.2	0.889436	cDNA FLJ58812, highly similar to Endoplasmin (Heat shock protein 90kDa beta member 1)
A0A024RDK3	256	473.9	0.888439	Calcium/calmodulin-dependent protein kinase (CaM kinase) II delta, isoform CRA_a
A0A024RBI8	197	364	0.885743	G protein-coupled receptor kinase interactor 2, isoform CRA_a
A0A024R983	218	402.75	0.885556	TROVE domain family, member 2, isoform CRA_b
V9GYE3	396.25	730.194	0.881869	Apolipoprotein A-II
P02760	1710	3144.67	0.87891	Protein AMBP
O14794	773.5	1390.87	0.846516	Smooth muscle myosin heavy chain SM1 (Fragment)
A0A024R3C4	211	378.05	0.841334	KDEL (Lys-Asp-Glu-Leu) containing 2, isoform CRA_a
E9PP73	187	334.97	0.840994	Coatomer subunit beta (Fragment)
Q68DG0	204	362.834	0.830741	Heat shock protein beta-7
O75881	218	383.667	0.815525	25-hydroxycholesterol 7-alpha-hydroxylase
A8K048	305	534.732	0.810007	Kinesin-like protein (Fragment)
B1PS43	439.6	753.74	0.777876	Myosin heavy chain 11 smooth muscle isoform
B7Z1V7	277	472	0.768901	cDNA FLJ51811, highly similar to Stress-70 protein, mitochondrial
A0A024QZJ4	439.6	748.186	0.767206	Myosin, heavy polypeptide 11, smooth muscle, isoform CRA_a
A0A024RA31	357	607.23	0.766319	Aquaporin 1 (Channel-forming integral protein, 28kDa)
B4DTY8	246	418.27	0.765776	cDNA FLJ61587, highly similar to Integrin alpha-1 (Fragment)
A0A024R4G1	204	343.97	0.753714	Leucine rich repeat containing 47, isoform CRA_a
H3BRG4	263	440.084	0.742716	Cytochrome b-c1 complex subunit 2, mitochondrial
V9HWB4	423.75	705.356	0.735138	Epididymis secretory sperm binding protein Li 89n
A5PL27	357	589.564	0.723724	CP protein
A0A024R883	173	284.668	0.718506	ATPase, H+ transporting, lysosomal 13kDa, V1 subunit G1, isoform CRA_a
P67775	534	878.54	0.718268	Serine/threonine-protein phosphatase 2A catalytic subunit alpha isoform
G3V438	530	867	0.71004	Activator of 90 kDa heat shock protein ATPase homolog 1 (Fragment)
V9HWP0	430	699.2	0.701369	Amyloid P component, serum
Q53FV4	1125.25	1829.13	0.700909	Lumican variant (Fragment)
Q53XB4	187	301.25	0.687923	Full-length cDNA clone CS0DF032YM23 of Fetal brain of Homo sapiens (human)
A0A0A0MSQ0	462.67	744.804	0.686877	Plastin-3
E7ENY0	190	305.667	0.68596	Alpha-adducin
P19652	385.75	619.148	0.682618	Alpha-1-acid glycoprotein 2
D3DSM4	596.5	955.176	0.679244	Collagen, type XVIII, alpha 1, isoform CRA_d
A0A024R580	215	342.898	0.673441	Calpain 1, (Mu/I) large subunit, isoform CRA_a
A8K4W2	204	322.875	0.662407	cDNA FLJ78635, highly similar to Homo sapiens ATP synthase, H+ transporting, mitochondrial F0 complex, subunit b, isoform 1 (ATP5F1), transcript variant 1, mRNA
A0A024R732	197	308.5	0.647075	Syntrophin, beta 2 (Dystrophin-associated protein A1, 59kDa, basic component 2), isoform CRA_a
P18669	187	292.625	0.646015	Phosphoglycerate mutase 1
B1AKJ6	218	339.875	0.640676	Oxysterol-binding protein
A0A024R687	235.5	363.1	0.62464	Pleckstrin homology domain containing, family C (With FERM domain) member 1, isoform CRA_b
B4DVE1	820.5	1238.11	0.593564	cDNA FLJ53478, highly similar to Galectin-3-binding protein
A8K9V0	701	1057.5	0.593171	cDNA FLJ77736, highly similar to Homo sapiens phospholipid scramblase 4 (PLSCR4), mRNA
P60709	686.58	1023.4	0.575868	Actin, cytoplasmic 1
P25398	360	535.125	0.571879	40S ribosomal protein S12
A0A024RCM3	277	410.5	0.567496	HCG2005638, isoform CRA_a
A0A024QZD1	1349	1992	0.562327	Ribosomal protein L18, isoform CRA_c
B7Z2R4	204	298.1	0.547227	Epsilon-sarcoglycan
Q07954	340.8	495.7	0.540542	Prolow-density lipoprotein receptor-related protein 1
P26022	319	461.667	0.533295	Pentraxin-related protein PTX3
Q05707	733.79	1048.78	0.51527	Collagen alpha-1(XIV) chain
Q76LA1	374	532.043	0.508503	CSTB protein
A0A087WTE1	733.5	1038.35	0.501427	Inter-alpha-trypsin inhibitor heavy chain H2
A0A087X1Z3	556.5	786.875	0.499753	Proteasome activator complex subunit 2
V9HWG1	197	277.994	0.496858	Epididymis secretory sperm binding protein Li 134P
B4DNT8	249	350.766	0.494363	cDNA FLJ54370, highly similar to Heat shock 70 kDa protein 1
A0A024R4X1	492	692.5	0.493156	Protein kinase C and casein kinase substrate in neurons 2, isoform CRA_a
B2R5H5	1662	2337	0.491737	cDNA, FLJ92476, highly similar to Homo sapiens LSM3 homolog, U6 small nuclear RNA associated (S. cerevisiae) (LSM3), mRNA
B2R9X3	225	316.17	0.490775	cDNA, FLJ94599, highly similar to Homo sapiens GDP-mannose 4,6-dehydratase (GMDS), mRNA
A8K2T4	246	345.184	0.488707	cDNA FLJ78207, highly similar to Human complement protein component C7 mRNA
D3DVA5	190	264.625	0.47795	Rho/rac guanine nucleotide exchange factor (GEF) 2, isoform CRA_a
B4DPD5	471	653.11	0.471599	cDNA FLJ56307, highly similar to Ubiquitin thioesterase protein OTUB1 (EC 3.4.-.-)
B3KQJ0	222	305.6	0.461085	cDNA FLJ90530 fis, clone NT2RP4002187, highly similar to Homo sapiens hydroxysteroid (17-beta) dehydrogenase 12 (HSD17B12), mRNA
A0A024R6G4	197	270.75	0.458766	Aldehyde dehydrogenase 6 family, member A1, isoform CRA_b
X6R3N0	204	278.686	0.450071	Long-chain fatty acid transport protein 3
A0A024R878	454	611.834	0.430448	Endoglin (Osler-Rendu-Weber syndrome 1), isoform CRA_a
Q9H9A6	218	292	0.42164	Leucine-rich repeat-containing protein 40
A0A024R6I7	330	437.974	0.408379	Alpha-1-antitrypsin
V9HW25	1445.6	1916.72	0.406973	Epididymis secretory protein Li 273
P09619	183	241.418	0.399687	Platelet-derived growth factor receptor beta
A0A024QZ64	669.33	882.876	0.399493	Fructose-bisphosphate aldolase
Q59GM9	249.25	327.808	0.395258	Alpha-1,4 glucan phosphorylase (Fragment)
A0A0A0MS15	395	519.333	0.394808	Protein IGHV3-49 (Fragment)
B4E0N9	669	875.793	0.388583	Glutamate dehydrogenase
Q53G34	760	994.895	0.388545	Mitochondrial carrier homolog 2 variant (Fragment)
B4DM22	298	385.324	0.37076	cDNA FLJ53357, highly similar to 26S proteasome non-ATPase regulatory subunit 2
Q15149	417.14	536.808	0.363875	Plectin
B0ZBE2	190	244.284	0.36256	Angiotensinogen (Serpin peptidase inhibitor, clade A, member 8)
B4E2J1	222	284	0.355331	cDNA FLJ54240, highly similar to ATPase family AAA domain-containing protein 1
Q5SRR8	796	1014.96	0.350579	N(G),N(G)-dimethylarginine dimethylaminohydrolase 2 (Fragment)
Q8TCF0	748	948.524	0.342646	LBP protein
A0A0A0MS51	337.33	424.918	0.333024	Gelsolin
A0A024R2W3	371	466.8	0.331385	Protein kinase, cAMP-dependent, regulatory, type II, alpha, isoform CRA_a
B2R6N0	249.5	313	0.327123	cDNA, FLJ93029, highly similar to Homo sapiens COP9 constitutive photomorphogenic homolog subunit 2 (Arabidopsis) (COPS2), mRNA
B3KY04	256	320.774	0.325413	cDNA FLJ46506 fis, clone THYMU3030752, highly similar to BTB/POZ domain-containing protein KCTD12
H9ZYJ2	510	638.667	0.324566	Thioredoxin
Q53EP4	1374	1710.92	0.316394	Dolichyl-diphosphooligosaccharide--protein glycosyltransferase subunit 1 (Fragment)
Q07960	206.75	255.534	0.305628	Rho GTPase-activating protein 1
P01598	239	294	0.298806	Ig kappa chain V-I region EU
B4DHK9	190	232.035	0.288343	cDNA FLJ51656, highly similar to Actin-like protein 2
Q16853	465.84	565.862	0.280616	Membrane primary amine oxidase
V9HWB7	209.5	254.223	0.279141	Aconitate hydratase
B4DK28	207.5	247.7	0.255483	cDNA FLJ56000, highly similar to Carboxypeptidase-like protein X2
A0A024R4T7	1537	1834.5	0.25527	Zinc finger protein 446, isoform CRA_a
A8K9W7	208	247.333	0.249873	cDNA FLJ77440, highly similar to Homo sapiens general transcription factor II, i (GTF2I), transcript variant 2, mRNA
A0A087WXI2	201	238.875	0.24906	IgGFc-binding protein
Q59G97	355.62	422.226	0.247679	EGF-containing fibulin-like extracellular matrix protein 1 isoform b variant (Fragment)
A0A024R371	2620.67	3109.94	0.246952	ADP-ribosylation-like factor 6 interacting protein 5, isoform CRA_a
Q4LE35	310	366.492	0.241515	ITGA7 variant protein (Fragment)
Q13151	222	261.5	0.236251	Heterogeneous nuclear ribonucleoprotein A0
B5MCX3	218	254.077	0.22094	Septin-2
A0A087X0X3	242	282	0.220688	Heterogeneous nuclear ribonucleoprotein M
Q8TBT6	267	309.333	0.212323	Putative uncharacterized protein (Fragment)
O14950	2287.67	2631.1	0.201787	Myosin regulatory light chain 12B
A0A024RBK3	208	238.46	0.197164	60S ribosomal protein L6
E9PMA0	246	281	0.191912	Apoptosis-inducing factor 1, mitochondrial
A0A0A0MSX9	183	208.25	0.186473	Isoleucine--tRNA ligase, cytoplasmic
Q06AH7	856.39	972.342	0.183196	Transferrin
A0N071	2882	3250.04	0.173389	Delta globin
V9HW92	631	710.375	0.170941	Epididymis secretory protein Li 112
A0A024R1A3	616	690.95	0.165651	Ubiquitin-activating enzyme E1 (A1S9T and BN75 temperature sensitivity complementing), isoform CRA_a
O15173	1976	2211.73	0.162595	Membrane-associated progesterone receptor component 2
B3KUI0	204	228.083	0.160987	cDNA FLJ39945 fis, clone SPLEN2023977, highly similar to Homo sapiens CD97 antigen (CD97), transcript variant 2, mRNA
P10909	1075.5	1200.82	0.159015	Clusterin
B4DPP8	440	491.082	0.158462	cDNA FLJ53075, highly similar to Kininogen-1
Q02750	232	258.667	0.156969	Dual specificity mitogen-activated protein kinase kinase 1
Q2NLC9	334	371.312	0.152786	PURA protein (Fragment)
B3KQF4	301	331.35	0.138592	cDNA FLJ90373 fis, clone NT2RP2004606, highly similar to Metalloproteinase inhibitor 1
P30046	527	580	0.13825	D-dopachrome decarboxylase
A0A0A0MTH3	843	926	0.13548	Integrin-linked protein kinase
A0A024R6Z0	766	830.25	0.116201	Dynein, cytoplasmic 1, light intermediate chain 2, isoform CRA_a
A8K666	176	190.167	0.111695	cDNA FLJ75460, highly similar to Homo sapiens phenylalanine-tRNA synthetase-like, beta subunit, mRNA
A8K0R3	808.33	872.636	0.110436	Osteoglycin (Osteoinductive factor, mimecan), isoform CRA_a
J3KN29	256	276	0.108524	26S proteasome non-ATPase regulatory subunit 9
A0A024RDR1	267	287.75	0.107976	Lipoma HMGIC fusion partner, isoform CRA_a
A8K2M0	364	390.833	0.102615	Proteasome (Prosome, macropain) 26S subunit, ATPase, 4, isoform CRA_b
V9HVY3	707.33	757.7	0.0992433	Protein disulfide-isomerase
A0A024RC87	268.5	285.94	0.0907904	Ribonuclease/angiogenin inhibitor 1, isoform CRA_a
B3KUI2	187	198.95	0.0893676	cDNA FLJ39965 fis, clone SPLEN2027157, highly similar to Homo sapiens tumor necrosis factor, alpha-induced protein 8 (TNFAIP8), mRNA
A0A024RDD3	190	202.057	0.0887605	SEC31-like 1 (S. cerevisiae), isoform CRA_d
D1MGQ2	517.03	547.646	0.0829956	Alpha-2 globin chain
P48594	187	197.333	0.0775964	Serpin B4
C9JEV0	187	196.82	0.0738386	Zinc-alpha-2-glycoprotein
I3L2R7	183	191.692	0.0669502	Pigment epithelium-derived factor (Fragment)
Q6IBG1	707.87	738.796	0.0616916	MYL9 protein
A0A024RAM4	544.33	567.75	0.0607743	Microtubule-associated protein 1B, isoform CRA_b
X6R3G6	746.2	778.282	0.0607306	Lactadherin
F8VY02	827	860.375	0.0570783	Endoplasmic reticulum resident protein 29
B0AZL7	211	219.343	0.0559424	cDNA, FLJ79457, highly similar to Insulin-like growth factor-binding proteincomplex acid labile chain
Q9HCB6	1082	1122.6	0.0531435	Spondin-1
B4DFG0	1419	1469.5	0.0504508	Protein DEK
B4DJ12	211	218.25	0.0487387	Protein-tyrosine-phosphatase
V9HW04	568.5	587.368	0.0471043	Serine/threonine-protein phosphatase
P17858	219.33	225.962	0.042977	ATP-dependent 6-phosphofructokinase, liver type
O95373	301	309.416	0.0397843	Importin-7
A0A024R5M3	853	876.293	0.0388668	Cortactin, isoform CRA_c
A0A087WSZ2	586.19	600.188	0.0340461	Alpha-actinin-3
W8W3L4	194	198.375	0.0321736	Mas-related G protein-coupled receptor C
A7VJC9	225	229.75	0.0301399	Salt-tolerant protein
E9PL57	173	176.417	0.0282216	Protein NEDD8-MDP1 (Fragment)
A0A024RC55	795.33	803.732	0.0151609	Milk fat globule-EGF factor 8 protein, isoform CRA_a
E9PB61	541	546.5	0.0145929	THO complex subunit 4
E7DVW5	392	395.333	0.0122159	Fatty acid binding protein 5 (Psoriasis-associated)
A0A087X1T7	849.17	855.306	0.0103873	Aggrecan core protein
A0A024RB75	326	327.333	0.00588856	Citrate synthase
C9JH19	336	336.22	0.000944313	Cathepsin D (Fragment)
B7Z8G2	1266	1265.5	-0.000569897	cDNA FLJ58213, highly similar to FK506-binding protein 5 (EC 5.2.1.8)
F5GZN3	746.2	745.804	-0.000765825	Lactadherin
P35442	263.5	261.73	-0.00972366	Thrombospondin-2
A8K7J3	197	195.5	-0.011027	cDNA FLJ75535, highly similar to Homo sapiens early endosome antigen 1, 162kD (EEA1), mRNA (Fragment)
A0A087X1J7	1975	1959.32	-0.0115015	Glutathione peroxidase
B3KTV0	367.67	363.486	-0.0165117	cDNA FLJ38781 fis, clone LIVER2000216, highly similar to HEAT SHOCK COGNATE 71 kDa PROTEIN
D9ZGF2	355.25	350.908	-0.0177418	Collagen, type VI, alpha 3
V9HW26	455.75	450.04	-0.0181894	ATP synthase subunit alpha
P50479	201	198.188	-0.0203295	PDZ and LIM domain protein 4
B4DJB4	190	186.9	-0.0237328	Isocitrate dehydrogenase [NAD] subunit, mitochondrial
A1YVW6	416	409	-0.0244827	Major prion protein
B4DNU9	346.5	339.86	-0.0279148	cDNA FLJ55731, highly similar to Polymerase I and transcript release factor
P63000	1141	1100.25	-0.0524674	Ras-related C3 botulinum toxin substrate 1
Q9HA77	208	200.5	-0.0529813	Probable cysteine--tRNA ligase, mitochondrial
P02671	474	456.108	-0.0555116	Fibrinogen alpha chain
B4DVY2	4160	3982.16	-0.0630338	cDNA FLJ54184, highly similar to Tropomyosin alpha-4 chain
Q8TCJ2	364	346.333	-0.0717772	Dolichyl-diphosphooligosaccharide--protein glycosyltransferase subunit STT3B
A0A0A0MQY0	1197	1136.56	-0.0747461	PDZ and LIM domain protein 3
B4E2S2	197	186.667	-0.0777313	cDNA FLJ61556, highly similar to Poly (ADP-ribose) polymerase 4 (EC 2.4.2.30)
A0A024QZ34	213.33	201.728	-0.0806755	Microfibrillar-associated protein 4, isoform CRA_a
A0A024RAY2	190	179.375	-0.0830206	Keratin 18, isoform CRA_a
B7Z3Y2	416	391.5	-0.0875712	cDNA FLJ51879, highly similar to Prenylcysteine oxidase (EC 1.8.3.5)
B4DN60	499	469.27	-0.0886216	cDNA FLJ52703, highly similar to Asparaginyl-tRNA synthetase, cytoplasmic (EC6.1.1.22)
A0A024RCB3	412	387.333	-0.0890687	Tetraspanin
A8K486	1576.82	1477.5	-0.0938579	Peptidyl-prolyl cis-trans isomerase
B4DE77	1688.78	1577.35	-0.0984786	cDNA FLJ55189, highly similar to Tubulin beta-4 chain
K7ERG3	4160	3878.97	-0.100911	Tropomyosin alpha-4 chain (Fragment)
A0A024R1H1	360	335	-0.103836	Selenoprotein M
A0A024R1A4	195	181.355	-0.104658	Ubiquitin-conjugating enzyme E2L 3, isoform CRA_a
B4DLF2	204	188.25	-0.115919	cDNA FLJ57526
A0A024R877	419	386.062	-0.118116	Delta-aminolevulinic acid dehydratase
A0A087WVI1	1329	1223.33	-0.119524	PDZ and LIM domain protein 2
D3DQ64	256	235.125	-0.122716	Adenylate kinase 4, mitochondrial
Q59GB4	299.43	274.144	-0.127285	Dihydropyrimidinase-like 2 variant (Fragment)
A8K5W7	766	701	-0.12793	cDNA FLJ75180, highly similar to Homo sapiens mitochondrial isoleucine tRNA synthetase, mRNA
Q5HYE3	492	450.25	-0.127932	Putative uncharacterized protein DKFZp686H1812
B7Z476	728	665.667	-0.129139	cDNA FLJ55170, highly similar to Sorting nexin-5
Q9Y490	872.18	795.8	-0.13222	Talin-1
V9HW89	249	225.766	-0.141318	Epididymis secretory sperm binding protein Li 95n
B1AH87	520	470	-0.145851	Putative peripheral benzodiazepine receptor-related protein (Fragment)
A0A0A0MSK3	187	168.5	-0.15029	HCG14925, isoform CRA_b
B4E1I8	503	450.175	-0.160072	cDNA FLJ54228, highly similar to Leucine-rich alpha-2-glycoprotein
A8K4T6	201	179.466	-0.163485	cDNA FLJ76282, highly similar to Homo sapiens proteasome (prosome, macropain) 26S subunit, non-ATPase, 5 (PSMD5), mRNA
B7Z863	601	535.25	-0.167152	Sarcolemmal membrane-associated protein
A0A024R9T1	241.33	214.694	-0.168725	HCG39634, isoform CRA_a
Q2TU84	215	191.25	-0.168877	Aspartate aminotransferase
B2RBR9	190.5	169.02	-0.172597	cDNA, FLJ95650, highly similar to Homo sapiens karyopherin (importin) beta 1 (KPNB1), mRNA
Q5JP53	1437.92	1275.45	-0.172977	Tubulin beta chain
Q8IWP6	1587.73	1407.08	-0.174259	Class IVb beta tubulin
A0A0G2JH68	229	202.934	-0.174337	Protein diaphanous homolog 1
P30837	239	211.5	-0.176353	Aldehyde dehydrogenase X, mitochondrial
A0A024R5Z7	1618.18	1427.95	-0.180427	Annexin
A0A024RAH1	244	213.856	-0.190241	LIM and senescent cell antigen-like domains 2, isoform CRA_a
Q96RW7	197	172.168	-0.194379	Hemicentin-1
B4DUR8	433	378.034	-0.195851	T-complex protein 1 subunit gamma
Q9UF24	260	226	-0.202189	Putative uncharacterized protein DKFZp586K0821 (Fragment)
A0A024R4K3	1599	1388.39	-0.203757	Malate dehydrogenase
Q9BVA1	1524.64	1321.71	-0.206067	Tubulin beta-2B chain
P36959	183	158.188	-0.210208	GMP reductase 1
B7Z1C9	392	338.167	-0.213119	Chaperonin containing TCP1, subunit 7 (Eta), isoform CRA_a
B4DL86	385	331.25	-0.216938	6-phosphogluconate dehydrogenase, decarboxylating
P21333	1333.12	1143.95	-0.22078	Filamin-A
A0A024R497	225	193	-0.221324	Acyl-CoA synthetase long-chain family member 3, isoform CRA_a
B3KXF9	222	188.667	-0.23472	cDNA FLJ45348 fis, clone BRHIP3011269, weakly similar to Prenylcysteine oxidase (EC 1.8.3.5)
P68366	363.44	306.99	-0.243526	Tubulin alpha-4A chain
O60664	273.67	231.04	-0.244295	Perilipin-3
Q15746	264.67	223.36	-0.244824	Myosin light chain kinase, smooth muscle
B4DVR4	506	426.4	-0.24693	cDNA FLJ60912, highly similar to Vinexin
B1AK85	638	535.5	-0.25267	F-actin-capping protein subunit beta
B2RAK1	496	416	-0.253757	cDNA, FLJ94965, highly similar to Homo sapiens leucyl/cystinyl aminopeptidase (LNPEP), mRNA
A0A024R2P0	381	318.95	-0.256461	40S ribosomal protein SA
Q59H15	655	547.25	-0.259295	SAM domain-and HD domain-containing protein 1 variant (Fragment)
P07741	180	149.765	-0.265296	Adenine phosphoribosyltransferase
A0A087WVQ6	422.65	351.258	-0.266932	Clathrin heavy chain
A0A024RAL1	292.84	243.3	-0.267376	Chondroitin sulfate proteoglycan 2 (Versican), isoform CRA_c
A0A024R462	985.62	818.11	-0.268737	Fibronectin 1, isoform CRA_n
A0A024R4X0	3479	2884.5	-0.270351	NADH-cytochrome b5 reductase
A8K1M2	353	291.667	-0.275348	cDNA FLJ75174, highly similar to Homo sapiens calmodulin 1 (phosphorylase kinase, delta), mRNA
Q6LES2	1806	1487.59	-0.279821	Annexin (Fragment)
B3KRN4	451	371.1	-0.281319	cDNA FLJ34625 fis, clone KIDNE2015244, highly similar to Serine protease HTRA1 (EC 3.4.21.-)
P02768	1438.13	1179.21	-0.286371	Serum albumin
Q56G89	1443.36	1180.61	-0.289899	Serum albumin
B8ZZU8	225	184	-0.290219	Transcription elongation factor B (SIII), polypeptide 2 (18kDa, elongin B), isoform CRA_b
A8K9T3	197	161.034	-0.29083	cDNA FLJ76467, highly similar to Homo sapiens acyl-CoA synthetase long-chain family member 1 (ACSL1), mRNA
B4DPP6	1441.49	1177.54	-0.29179	cDNA FLJ54371, highly similar to Serum albumin
A0A024RAD5	1297	1058.25	-0.293498	Dolichyl-diphosphooligosaccharide--protein glycosyltransferase 48 kDa subunit
A0A024R972	466	379.472	-0.296337	Laminin, gamma 1 (Formerly LAMB2), isoform CRA_a
A0A0A0MTQ6	201	163.6	-0.297023	Protein IGKV2D-28
B7WNR0	1442.87	1173.51	-0.298116	Serum albumin
Q8N1K8	520	421.333	-0.30355	cDNA FLJ40556 fis, clone THYMU2002583, highly similar to DYNAMIN 2
A0A024RBB5	2737.5	2212.62	-0.3071	Cysteine and glycine-rich protein 2, isoform CRA_a
A0A087X0A8	711	574.506	-0.307528	Collagen alpha-1(XII) chain
B2R7F8	596	481.45	-0.307926	Plasminogen
B4DZF2	197.5	159.5	-0.308296	cDNA FLJ59571, highly similar to Eukaryotic translation initiation factor 4gamma 2
E5RIP1	298	240.25	-0.310776	40S ribosomal protein S20
B4DL02	187	150.5	-0.313275	cDNA FLJ56101, highly similar to SHC-transforming protein 1
B4DFP1	453.75	364.438	-0.316224	cDNA FLJ51818, highly similar to Phosphoglucomutase-1 (EC 5.4.2.2)
C9JJP5	201	160.5	-0.324622	Protein TFG (Fragment)
O00232	263	210	-0.324673	26S proteasome non-ATPase regulatory subunit 12
Q7L523	218	174	-0.325241	Ras-related GTP-binding protein A
B1AKG0	485	385.312	-0.331956	Complement factor H-related protein 1
C9IY88	208	164.25	-0.34069	3-hydroxyanthranilate 3,4-dioxygenase (Fragment)
B2R742	190	150	-0.341037	cDNA, FLJ93273, highly similar to Homo sapiens cytidine and dCMP deaminase domain containing 1 (CDADC1), mRNA
Q13797	242	190.75	-0.343324	Integrin alpha-9
Q6YHK3	226	178.002	-0.344429	CD109 antigen
Q6FGZ3	211	165.5	-0.350412	EPHX1 protein (Fragment)
B2R4R9	603	472	-0.353371	HCG26477
K7EML3	176	137.75	-0.353523	UPF0515 protein C19orf66 (Fragment)
A0A087WVP4	454.5	355.226	-0.355543	Smoothelin
P26447	192.67	150.326	-0.358037	Protein S100-A4
A0A024RDG1	390	304.168	-0.358608	Vesicle docking protein p115, isoform CRA_a
B4DWC4	437	340.4	-0.360402	Chloride intracellular channel protein
Q8WUI6	217	168.84	-0.362038	COPG protein (Fragment)
Q14204	230.5	179.288	-0.362488	Cytoplasmic dynein 1 heavy chain 1
O60774	256	198.667	-0.365794	Putative dimethylaniline monooxygenase [N-oxide-forming] 6
O95782	315	244.292	-0.366742	AP-2 complex subunit alpha-1
A0A0C4DH35	374	289.582	-0.369064	Protein IGHV3-35 (Fragment)
A2KBC4	614.6	475.042	-0.371593	Anti-TN-C scFv (Fragment)
A0A024R7F7	211	162	-0.381249	Transportin 2 (Importin 3, karyopherin beta 2b), isoform CRA_b
E9PSB0	294	225.25	-0.384289	EH domain-binding protein 1-like protein 1
G5E977	330	252.415	-0.386668	Nicotinate phosphoribosyltransferase
P54886	204	155.812	-0.388758	Delta-1-pyrroline-5-carboxylate synthase
Q68DS3	742	563.5	-0.397004	Putative uncharacterized protein DKFZp686H17246 (Fragment)
P48059	350	265.625	-0.397964	LIM and senescent cell antigen-like-containing domain protein 1
B2R8I2	253	191.75	-0.399911	cDNA, FLJ93914, highly similar to Homo sapiens histidine-rich glycoprotein (HRG), mRNA
B4DDB6	365.5	276.625	-0.40194	Heterogeneous nuclear ribonucleoprotein A3, isoform CRA_a
A0A0B4J269	1822.33	1374.66	-0.406705	Tubulin beta-3 chain
B4DYG5	179.5	135.4	-0.406756	cDNA FLJ60960, highly similar to Phosphatidylinositol 4-kinase alpha (EC 2.7.1.67)
P12314	225	169.333	-0.410059	High affinity immunoglobulin gamma Fc receptor I
A0A024R2M7	850	639.25	-0.411083	Oxidative-stress responsive 1, isoform CRA_a
A0A024R889	942.75	705.148	-0.418949	Spectrin, alpha, non-erythrocytic 1 (Alpha-fodrin), isoform CRA_g
A0A024R9Q1	621	464.35	-0.419381	Thrombospondin 1, isoform CRA_a
Q8IVC0	645	480.5	-0.424763	Serpin peptidase inhibitor, clade D (Heparin cofactor), member 1
B3KVC9	303.25	225.88	-0.424951	cDNA FLJ16406 fis, clone UTERU2026142, highly similar to Cysteine and glycine-rich protein 1
P21281	208	154.36	-0.430285	V-type proton ATPase subunit B, brain isoform
A2J1N5	1066.5	790.168	-0.432654	Rheumatoid factor RF-ET6 (Fragment)
P32456	586	431.333	-0.442097	Interferon-induced guanylate-binding protein 2
J3KPM9	378	278.22	-0.44216	Signal transducer and activator of transcription
A4D2D2	215	157.75	-0.446697	Procollagen C-endopeptidase enhancer
K9JA46	245.5	180.05	-0.447325	Epididymis luminal secretory protein 52
B2RAD8	211	154.625	-0.448469	Protein argonaute
P01112	384.5	281.082	-0.45199	GTPase HRas
Q5T8U5	1115	812.184	-0.457165	Surfeit 4
A0A024R6N2	215	156	-0.462791	Non-specific serine/threonine protein kinase
P35555	549	397.7	-0.465126	Fibrillin-1
B4DYR6	281	203.276	-0.46713	cDNA FLJ56381, highly similar to Dynamin-1-like protein (EC 3.6.5.5)
D3DP78	650	468.974	-0.470932	Aspartyl-tRNA synthetase, isoform CRA_b
C0JYY2	326.12	235.224	-0.471368	Apolipoprotein B (Including Ag(X) antigen)
Q16629	1386	997.5	-0.474539	Serine/arginine-rich splicing factor 7
M0R026	194	137.125	-0.500565	Acetolactate synthase-like protein
B2RB32	494	349.148	-0.500672	Alpha-1,4 glucan phosphorylase
Q59EU6	735	519.034	-0.501915	EF hand domain family, member D1 variant (Fragment)
A7E2Y5	211	148.665	-0.505178	DnaJ (Hsp40) homolog, subfamily C, member 13
B4DTQ6	211	148.5	-0.50678	cDNA FLJ54883, highly similar to Unc-13 homolog D
Q9Y263	214.5	150.335	-0.512797	Phospholipase A-2-activating protein
B7Z1G4	367	256	-0.519636	cDNA FLJ61601, highly similar to Inosine-5&#039;-monophosphate dehydrogenase 2 (EC 1.1.1.205)
A0A024RDY3	190	132.5	-0.520007	Lysosomal-associated membrane protein 1, isoform CRA_a
Q9BQE3	496.71	346.3	-0.520381	Tubulin alpha-1C chain
Q4KMQ8	201	140.1	-0.520739	C-terminal binding protein 1
A0A0A0MTS2	208	144.793	-0.522597	Glucose-6-phosphate isomerase (Fragment)
A0A068LRX1	628	435.25	-0.52892	Ig heavy chain variable region (Fragment)
J3KPS3	335.83	232.63	-0.529694	Fructose-bisphosphate aldolase
A0A087WU93	195.5	135.366	-0.530303	AP-2 complex subunit beta (Fragment)
B1AH49	225	155.167	-0.536106	Sulfurtransferase
I3L397	284	192.838	-0.558502	Eukaryotic translation initiation factor 5A (Fragment)
A0A024R056	1051	711.833	-0.562151	Guanine nucleotide binding protein (G protein), beta polypeptide 1, isoform CRA_a
B7Z2A1	190	128.534	-0.563849	cDNA FLJ56068, highly similar to DNA damage-binding protein 1
A0A087X2G1	239	161.6	-0.564583	ATP-dependent RNA helicase DDX1
Q9Y3B5	190	128	-0.569856	CGI-111 protein
A0A087X0K0	183	123.25	-0.570256	Collagen alpha-1(XV) chain
F5H365	506	340.6	-0.571059	Protein transport protein Sec23A
E7EX90	220	148.014	-0.57177	Dynactin subunit 1
Q8IXW6	654	438.454	-0.576865	Dihydropyrimidinase-like 3
Q71U36	542.12	363.146	-0.578063	Tubulin alpha-1A chain
A0A024RD80	289.79	193.9	-0.579695	Heat shock protein 90kDa alpha (Cytosolic), class B member 1, isoform CRA_a
Q8TD55	621	415.5	-0.579745	Pleckstrin homology domain-containing family O member 2
P54709	876	585.125	-0.582186	Sodium/potassium-transporting ATPase subunit beta-3
B4DQ03	204	136.167	-0.583196	cDNA FLJ57859, highly similar to Ras-related GTP-binding protein C
Q8IUX7	987.33	658.458	-0.584441	Adipocyte enhancer-binding protein 1
A8K7R5	201	134	-0.584963	Caspase
A0A024R1V4	211	140.333	-0.588385	60S ribosomal protein L27
A0A024R4S2	197	131	-0.588629	Protein phosphatase 1, regulatory (Inhibitor) subunit 12C, isoform CRA_b
A0A024R882	525.5	348.1	-0.594189	Stomatin, isoform CRA_a
A0A024R374	190	125.668	-0.596388	Cathepsin B, isoform CRA_a
V9HVY1	257.5	169.784	-0.600872	Epididymis secretory sperm binding protein Li 78p
Q53EY8	442	289.866	-0.60866	Adenylate kinase 1 variant (Fragment)
A0A024R240	414	270.894	-0.611902	Guanine nucleotide binding protein (G protein), q polypeptide, isoform CRA_c
A5YKK6	336	219.8	-0.61227	CCR4-NOT transcription complex subunit 1
A0A068LN11	246	160.5	-0.616085	Ig heavy chain variable region (Fragment)
A0A0C4DH25	897.6	585.538	-0.61631	Protein IGKV3D-20 (Fragment)
O43854	1093	712.5	-0.617331	EGF-like repeat and discoidin I-like domain-containing protein 3
A8MZF9	284	185	-0.618366	Developmentally-regulated GTP-binding protein 2
B4DDC9	183	118.833	-0.622904	cDNA FLJ59448, highly similar to Trifunctional enzyme subunit beta, mitochondrial
P13639	249.47	161.692	-0.625618	Elongation factor 2
B4DF17	180	116.167	-0.631801	cDNA FLJ59187, highly similar to Multiple coagulation factor deficiency protein 2 homolog
Q96QR8	753	485.833	-0.632188	Transcriptional activator protein Pur-beta
A0A024R694	691.26	444.152	-0.638175	Actinin, alpha 1, isoform CRA_a
A1L0S7	497.5	319.166	-0.64039	TNS1 protein (Fragment)
A8K6K2	201	128.5	-0.645427	cDNA FLJ75877, highly similar to Homo sapiens 5&#039;-nucleotidase, cytosolic II (NT5C2), mRNA
B7Z5V6	204	130.085	-0.649115	cDNA FLJ57046, highly similar to Lysosomal alpha-glucosidase (EC 3.2.1.20)
O60701	208	132.5	-0.650591	UDP-glucose 6-dehydrogenase
I3L2F9	3581	2277.67	-0.652806	Uncharacterized protein
A0A024R6G3	552.15	350.288	-0.656519	Fibulin 5, isoform CRA_b
Q53T09	185	116.766	-0.663905	Putative uncharacterized protein XRCC5 (Fragment)
Q53FB0	608	382.25	-0.669555	Chloride intracellular channel protein (Fragment)
P07327	219.93	138.268	-0.669577	Alcohol dehydrogenase 1A
B2RE46	3213	2015.23	-0.672976	cDNA, FLJ96923, highly similar to Homo sapiens ribophorin II (RPN2), mRNA
Q15155	215	134.5	-0.67673	Nodal modulator 1
P07360	560.67	350.082	-0.679459	Complement component C8 gamma chain
A8K660	339.5	211.833	-0.680482	Adiponectin
B3KMV8	229	142.438	-0.685019	cDNA FLJ12766 fis, clone NT2RP2001520, highly similar to Calcium-binding mitochondrial carrier protein Aralar1
B4E1E1	403.5	250.565	-0.687384	cDNA FLJ51598, highly similar to C4b-binding protein alpha chain
A0A0A0MSJ2	409	253.333	-0.691064	Arf-GAP with Rho-GAP domain, ANK repeat and PH domain-containing protein 1
H9KV75	1047.54	644.974	-0.699692	Alpha-actinin-1
Q96AB3	329	202.39	-0.70095	Isochorismatase domain-containing protein 2, mitochondrial
A4ZU86	197	121.167	-0.701203	Truncated nucleolar phosphoprotein B23
A0A024R1T9	291	178.9	-0.701866	ATP citrate lyase, isoform CRA_b
A0A024R3I5	457.67	279.15	-0.713267	Melanoma cell adhesion molecule, isoform CRA_a
A0A024R467	201	122.5	-0.714414	BCS1-like (Yeast), isoform CRA_a
A0A087X142	208	126.75	-0.714598	Septin-8
Q52LJ0	208	126.667	-0.715547	Protein FAM98B
A6NLM8	385	234.332	-0.716301	Translocon-associated protein subunit delta
A0A024RBH2	548	332.918	-0.719011	Cytoskeleton-associated protein 4, isoform CRA_c
C8C504	2319.25	1407.59	-0.720435	Beta-globin
V9HWB8	624.31	378.678	-0.721291	Pyruvate kinase
A0A024RDB0	291	176	-0.725444	Ubiquitin-activating enzyme E1-like 2, isoform CRA_a
B4E1Z4	1303.33	787.232	-0.727342	Uncharacterized protein
A0A024R8V0	562	338.25	-0.73248	Septin 9, isoform CRA_a
Q2NKY5	2601.8	1563.99	-0.734282	TUBB6 protein
A0A024R5H6	728	437.5	-0.734655	Phosphofurin acidic cluster sorting protein 1, isoform CRA_a
A0A024R0J9	176	105.5	-0.738332	Heterogeneous nuclear ribonucleoprotein U-like 1, isoform CRA_a
Q96PD5	617.5	370.126	-0.738423	N-acetylmuramoyl-L-alanine amidase
A4FVC0	215.67	128.584	-0.746114	Protein argonaute (Fragment)
B3KSQ7	1631	970	-0.7497	Drebrin 1, isoform CRA_d
J9ZVQ3	3187	1893.33	-0.75127	Apolipoprotein E (Fragment)
B2RDF5	1058	626.5	-0.755953	cDNA, FLJ96587, highly similar to Homo sapiens SUMO-1 activating enzyme subunit 2 (UBA2), mRNA
A0A097PIC4	347.67	205.15	-0.761039	Mammalian enabled variant 11a
K7EL62	237	139.6	-0.763588	Guanine nucleotide-binding protein subunit alpha-11 (Fragment)
Q12882	208	122.5	-0.763802	Dihydropyrimidine dehydrogenase [NADP(+)]
C3VMY8	332.14	195.354	-0.765701	Alpha B crystallin
A0A024R4U3	201	117.25	-0.777608	Tubulin tyrosine ligase-like family, member 12, isoform CRA_a
B4DNR7	301	175	-0.782409	cDNA FLJ51010, highly similar to Latent-transforming growth factor beta-binding protein, isoform 1S
H0YCQ8	190	110.4	-0.783259	Eukaryotic translation initiation factor 3 subunit M (Fragment)
A0A0A0MRE1	194	112.5	-0.786132	Exocyst complex component 7 (Fragment)
A7MBN2	433.5	251.332	-0.786438	TNC protein
A0A024RAM0	201	116.333	-0.788931	Transportin 1, isoform CRA_a
A0A024RB16	263	149.484	-0.815072	Family with sequence similarity 62 (C2 domain containing), member A, isoform CRA_a
A8K669	461	261.5	-0.817956	cDNA FLJ78452, highly similar to Homo sapiens legumain (LGMN), transcript variant 2, mRNA
Q9BWU5	2503	1416.12	-0.821719	Mutant hemoglobin beta chain (Fragment)
A0A087WT90	204	115	-0.826935	39S ribosomal protein L46, mitochondrial
B4E0A1	371	208.625	-0.830507	cDNA FLJ56277, highly similar to Toll-like receptor 9
A0A024R5Z9	679.68	382.148	-0.830724	Pyruvate kinase
Q59ET0	626	351.168	-0.834001	Glucan , branching enzyme 1 variant (Fragment)
A0A024R8R4	176	98	-0.844722	Nuclear protein localization 4 homolog (S. cerevisiae), isoform CRA_a
B7Z5S9	373	206.376	-0.8539	cDNA FLJ61359, highly similar to Adapter-relatedprotein complex 2 alpha- 2 subunit
B4YAH7	256	141.583	-0.854501	ALDH2 (Fragment)
A0A024R7C7	459	253.277	-0.85778	Interleukin enhancer binding factor 3, 90kDa, isoform CRA_d
B2RCM3	353.33	194.906	-0.858238	cDNA, FLJ96158, highly similar to Homo sapiens calpain 2, (m/II) large subunit (CAPN2), mRNA
H7BYH4	352	194.115	-0.858664	Superoxide dismutase [Cu-Zn]
B3KTV4	197	108.61	-0.859039	cDNA FLJ38805 fis, clone LIVER2005625, highly similar to Adenylosuccinate synthetase isozyme 1 (EC 6.3.4.4)
B2MUD5	242	133.167	-0.861774	Neutrophil elastase (Fragment)
A0A024R2F9	2109.5	1159.75	-0.863087	Transmembrane protein 43, isoform CRA_a
Q9H3U1	232	127.5	-0.863628	Protein unc-45 homolog A
A0A024R625	385	211.5	-0.864201	Serine/threonine-protein phosphatase
V9HW35	271.33	148.482	-0.869761	Epididymis secretory protein Li 55
F8W9X7	183	100	-0.871844	Coiled-coil domain-containing protein 93
B7Z629	187	102.11	-0.872914	cDNA FLJ61371, highly similar to Phosphatidylinositol 3-kinase regulatory subunit alpha
A0A075B6S5	1048	570	-0.878605	Protein IGKV1-27 (Fragment)
B3KNJ3	194	105.333	-0.881095	cDNA FLJ14684 fis, clone NT2RP2004933, highly similar to Death-associated protein kinase 3 (EC 2.7.11.1)
A0A024QZN8	485	261.5	-0.891174	Hect domain and RLD 4, isoform CRA_b
A8K520	624	336	-0.893085	cDNA FLJ78340, highly similar to Homo sapiens proline synthetase co-transcribed homolog (PR
A0A087X0W8	263	141.5	-0.894261	Transcription factor p65
B7Z3E5	498	267.696	-0.89555	cDNA FLJ53573, highly similar to Myosin Ic
B4DDR2	435.67	233.926	-0.897184	cDNA FLJ54588, highly similar to Major vault protein
V9HW44	206	110.434	-0.89946	Epididymis secretory protein Li 303
Q15582	774.86	411.152	-0.914264	Transforming growth factor-beta-induced protein ig-h3
A0A090N8G0	204	107.917	-0.91864	Glycyl-tRNA synthetase
H0YG54	513	271.333	-0.918893	Oligoribonuclease, mitochondrial
Q9Y625	1172	616.534	-0.92672	Glypican-6
Q96HE7	274	143.167	-0.93648	ERO1-like protein alpha
A0A024RAN2	464.67	240.832	-0.948176	Calpastatin, isoform CRA_a
A0A0D9SF53	579	298.634	-0.955185	ATP-dependent RNA helicase DDX3X
O60240	378	194.5	-0.958616	Perilipin-1
A0A0A7E7X3	657	335	-0.971732	Endoplasmic reticulum aminopeptidase 1 (Fragment)
P33764	185	94.25	-0.972961	Protein S100-A3
A0A024QZE6	218	111	-0.973768	Chromosome 16 open reading frame 58, isoform CRA_a
B4DDT3	648.67	329.846	-0.975692	cDNA FLJ54622, highly similar to Prothrombin (EC 3.4.21.5)
A8K5T0	1330.5	675.772	-0.97736	cDNA FLJ75416, highly similar to Homo sapiens complement factor H (CFH), mRNA
A0A024R3H3	350	177.585	-0.978845	Loss of heterozygosity, 11, chromosomal region 2, gene A, isoform CRA_b
Q53EX3	347	175.833	-0.980727	Glypican 1 variant (Fragment)
A8K7T4	822	416.5	-0.980822	cDNA FLJ75774, highly similar to Homo sapiens lectin, mannose-binding 2 (LMAN2), mRNA
A0A0A0MTR5	201	101.5	-0.985716	Putative hydroxypyruvate isomerase
A0A024R8S5	235	118.165	-0.991858	Protein disulfide-isomerase
Q567R0	1065	535	-0.993243	UQCRH protein
G9K388	1388	694.978	-0.997968	YWHAE/FAM22A fusion protein (Fragment)
A0A0C4DGQ5	425.33	212.768	-0.999301	Calpain small subunit 1
A6NLH6	176	88	-1	Protein cornichon homolog 4
O43707	754.86	376.308	-1.0043	Alpha-actinin-4
Q9BUF5	3581	1780.95	-1.00772	Tubulin beta-6 chain
S6BAP0	465	231.083	-1.00882	IgG H chain
B4DXC4	311.67	154.126	-1.01591	cDNA FLJ58636, moderately similar to Atlastin
E9KL26	300.5	148.056	-1.02122	Epididymis tissue protein Li 173
A0A087X1U6	524	257.83	-1.02315	Epiplakin
A4D2J0	183	89.75	-1.02786	SNARE protein Ykt6
F5GWF6	319	156.1	-1.03109	T-complex protein 1 subunit beta
K7EJ44	861	421.294	-1.03119	Profilin 1, isoform CRA_b
P02790	621.28	303.566	-1.03323	Hemopexin
P61077	229	111.7	-1.03572	Ubiquitin-conjugating enzyme E2 D3
Q8WUP2	438.5	213.438	-1.03876	Filamin-binding LIM protein 1
E9PK47	494	240.228	-1.04011	Alpha-1,4 glucan phosphorylase
A0A024QZT9	475	230.5	-1.04316	NAD(P)H dehydrogenase, quinone 2, isoform CRA_a
B2RMS9	446	216.42	-1.04321	Inter-alpha (Globulin) inhibitor H4 (Plasma Kallikrein-sensitive glycoprotein)
Q9BRF8	267	129.25	-1.04668	Serine/threonine-protein phosphatase CPPED1
C9J1E7	204	98.6	-1.04891	AP-1 complex subunit beta-1 (Fragment)
Q53EY4	461	221.667	-1.05637	RAB31, member RAS oncogene family variant (Fragment)
B4DLV8	223.5	106.85	-1.06469	Ribosomal protein L9, isoform CRA_d
C9JLV5	253	120	-1.0761	COP9 signalosome complex subunit 3 (Fragment)
Q06210	277	131.25	-1.07757	Glutamine--fructose-6-phosphate aminotransferase [isomerizing] 1
Q53T59	239	112.3	-1.08965	HCLS1-binding protein 3
A8K9U6	176	82.3333	-1.09603	cDNA FLJ76121, highly similar to Homo sapiens zinc finger CCCH-type, antiviral 1 (ZC3HAV1), transcript variant 1, mRNA
A0A087WU65	433	202.443	-1.09685	Vacuolar protein sorting-associated protein 45
A0A0C4DG40	204	94	-1.11784	Nesprin-1
A0A068W6H0	1041.67	478.944	-1.12097	Basal cell adhesion molecule (Lutheran blood group)
Q53FT8	1256	576.75	-1.12282	Proteasome subunit beta type (Fragment)
A0A024RDS2	477.33	217.78	-1.13212	Periostin, osteoblast specific factor, isoform CRA_c
B4DUC8	419.67	191.116	-1.13481	S-methyl-5&#039;-thioadenosine phosphorylase
V9HW43	544.43	246.728	-1.14183	Epididymis secretory protein Li 102
P0C0L5	1581	708.718	-1.15755	Complement C4-B
A0A024R944	3534	1579.81	-1.16155	Serpin peptidase inhibitor, clade C (Antithrombin), member 1, isoform CRA_a
A8HT81	204	90.6667	-1.16993	Glutathione S-transferase M2 (Muscle) (Fragment)
A0A023T695	239	106	-1.17295	Septin 7 variant 4
B4E1C0	406	179.5	-1.1775	cDNA FLJ54225, moderately similar to Bifunctional coenzyme A synthase
K7EP04	280.5	123.904	-1.17878	Heat shock protein beta-6
Q549M8	371	163	-1.18655	CLE7
B2R888	404	177.267	-1.18843	Monocyte differentiation antigen CD14
Q27J81	176	77.1675	-1.18951	Inverted formin-2
Q96A00	777	336.125	-1.20892	Protein phosphatase 1 regulatory subunit 14A
A0A024R9U8	309.33	133.7	-1.21015	HECT, UBA and WWE domain containing 1, isoform CRA_c
Q13584	1759	744.25	-1.2409	Isocitrate dehydrogenase [NADP]
V9HWE0	3135.85	1319.44	-1.24893	Annexin
H7BZT7	234.17	98.418	-1.25056	S-formylglutathione hydrolase (Fragment)
Q15124	1534.2	638.25	-1.26529	Phosphoglucomutase-like protein 5
A0A0C4DH07	1801	742.904	-1.27755	Latent-transforming growth factor beta-binding protein 4
E5RFE7	409	167.167	-1.29081	Carbonic anhydrase 1 (Fragment)
P53004	208	85	-1.29105	Biliverdin reductase A
A0A024RAI1	912	369.875	-1.302	ARP3 actin-related protein 3 homolog (Yeast), isoform CRA_a
A0A024RCR2	222	89.875	-1.30457	Guanine nucleotide binding protein-like 1, isoform CRA_a
E2RVJ0	680.67	274.538	-1.30995	Anion exchange protein
A0A087WSY5	1349.5	544.057	-1.3106	Carboxypeptidase B2
A0A024R978	1110	447.096	-1.3119	Chromosome 1 open reading frame 24, isoform CRA_a
B7Z1C5	1985	793	-1.32375	Glutathione synthetase
A2JA19	294	117.333	-1.3252	Anti-mucin1 light chain variable region (Fragment)
V9HWA9	680.28	270.968	-1.32801	Epididymis secretory sperm binding protein Li 62p
B4E225	190	75.6667	-1.32827	cDNA FLJ58349, highly similar to Vacuolar protein sorting protein 52
B7Z795	218	86.8	-1.32856	Carboxylic ester hydrolase
A8K7Q1	957	379.833	-1.33315	cDNA FLJ77770, highly similar to Homo sapiens nucleobindin 1 (NUCB1), mRNA
A0A087WVC4	409	161.875	-1.33722	cAMP-dependent protein kinase catalytic subunit beta
A3KPE2	305	120	-1.34577	Apolipoprotein C-III
Q2TSD0	3762.06	1479.57	-1.34635	Glyceraldehyde-3-phosphate dehydrogenase
A0A0B4J2D9	360	140.667	-1.35572	Protein IGKV1D-13 (Fragment)
A0A0B4J2A4	430	167.4	-1.36104	3-ketoacyl-CoA thiolase, mitochondrial
Q5EBL4	482	186.895	-1.36681	RILP-like protein 1
F5H157	385	149	-1.36955	Ras-related protein Rab-35 (Fragment)
A8K5S3	346.5	133.884	-1.37187	cDNA FLJ78449
Q96JB5	176	67.61	-1.38027	CDK5 regulatory subunit-associated protein 3
E9PPH5	204	77.8333	-1.39011	Acidic leucine-rich nuclear phosphoprotein 32 family member E (Fragment)
A0A024QZE7	1204.67	457.202	-1.39773	Transforming growth factor beta 1 induced transcript 1, isoform CRA_a
B3KXW5	190	72	-1.39993	cDNA FLJ46199 fis, clone TESTI4007965, highly similar to AP-1 complex subunit gamma-1
E7EPZ9	454	171.8	-1.40196	Tenascin-X
A0A024RAJ6	239	90.3333	-1.40368	Beta-hexosaminidase
V9HWC0	2128.33	801.176	-1.40953	Epididymis luminal protein 70
A0A024RAK9	548	205.812	-1.41285	Hyaluronan and proteoglycan link protein 1, isoform CRA_a
F6X2W2	360	134.667	-1.4186	Neuronal growth regulator 1
Q6UW46	294	109.58	-1.42383	VGPW2523
B4DIZ2	465	173.25	-1.42438	cDNA FLJ57995, moderately similar to Ubiquitin-conjugating enzyme E2-25 kDa (EC 6.3.2.19)
A0A024R4F1	776.03	289.11	-1.42449	Enolase 1, (Alpha), isoform CRA_a
A0A024R4V7	180	66.5	-1.43657	Uncharacterized protein
A0A087WT59	259.67	95.21	-1.44749	Transthyretin
B3KP89	225	82.3333	-1.45038	cDNA FLJ31446 fis, clone NT2NE2000909, highly similar to Guanine nucleotide-binding protein G(o) subunit alpha 1
K7EJ78	617	225.77	-1.45042	40S ribosomal protein S15
G1UI32	371	134.957	-1.45891	Pyridoxal kinase (Fragment)
B7Z4B2	1353	490.75	-1.4631	cDNA FLJ56108, highly similar to Puromycin-sensitive aminopeptidase (EC 3.4.11.-)
J3QL71	298	107.86	-1.46615	Secernin-2
A0A024RA52	326	117.777	-1.46882	Proteasome subunit alpha type
B1AKZ4	222	80.1675	-1.46947	Phosphoprotein enriched in astrocytes 15, isoform CRA_a
P59666	7523	2698.75	-1.47902	Neutrophil defensin 3
B0AZT9	305	109.333	-1.48008	cDNA, FLJ79529, highly similar to Syntaxin-12
B4DIY0	197	70.5	-1.4825	cDNA FLJ57505, highly similar to Tubulin-specific chaperone cofactor E-likeprotein
B4DDC2	225	80.1667	-1.48885	cDNA FLJ52248, highly similar to Deoxycytidylate deaminase (EC 3.5.4.12)
Q9NP55	301	107.167	-1.48991	BPI fold-containing family A member 1
A0A0C4DGQ8	190	67.25	-1.49839	Dehydrogenase/reductase SDR family member 7B
Q0QEN7	2054.17	721.91	-1.50866	ATP synthase subunit beta (Fragment)
B4DJ81	1520	530.814	-1.51779	NADH-ubiquinone oxidoreductase 75 kDa subunit, mitochondrial
B4DE30	434.67	150.3	-1.53208	cDNA FLJ51711, highly similar to T-complex protein 1 subunit epsilon
Q96LD4	230.5	78.53	-1.55345	Tripartite motif-containing protein 47
B3KM97	930	314.75	-1.56302	cDNA FLJ10554 fis, clone NT2RP2002385, highly similar to Synaptic glycoprotein SC2
D3DNA1	193.5	65.4375	-1.56414	Integrin beta
B3KSH1	222	75	-1.5656	Eukaryotic translation initiation factor 3 subunit F
B2RDN3	340	114.667	-1.56809	Cytosolic Fe-S cluster assembly factor NUBP2
Q9Y4E8	551	185.5	-1.57063	Ubiquitin carboxyl-terminal hydrolase 15
A0A024R035	995	329.665	-1.5937	Complement component 9, isoform CRA_a
P16152	3987	1318.88	-1.59599	Carbonyl reductase [NADPH] 1
P49747	850	280.277	-1.60061	Cartilage oligomeric matrix protein
A0A024QZN4	1793.18	591.182	-1.60085	Vinculin, isoform CRA_c
P46939	1277	418.062	-1.61097	Utrophin
Q6EMK4	440	143.667	-1.61478	Vasorin
F8W8T1	214.67	70.0425	-1.61582	Interferon-induced GTP-binding protein Mx1
C9JA05	805	262	-1.61942	Protein JCHAIN (Fragment)
Q9Y4G6	1035.5	336.642	-1.62104	Talin-2
P61586	322	104.6	-1.62218	Transforming protein RhoA
E7DVW4	242	78.5	-1.62424	Epididymis secretory protein Li 104
A8K5C2	183	59	-1.63306	cDNA FLJ75055
B5BUB5	193.67	62.3325	-1.63554	Autoantigen La (Fragment)
Q5NV74	3669.5	1178.67	-1.63843	V2-14 protein (Fragment)
B4DZ87	451	144.562	-1.64143	cDNA FLJ57240, highly similar to Mitochondrial proteins import receptor
Q05DB4	1672	535.293	-1.64318	HEBP2 protein (Fragment)
B3KQT2	635	202.188	-1.65106	Protein disulfide-isomerase
A0A087WWY3	1292	410.733	-1.65333	Filamin-A
A0A087X0S5	3174	1006.93	-1.65634	Collagen alpha-1(VI) chain
V9HWC7	4472.75	1418.87	-1.65642	Epididymis secretory sperm binding protein Li 128m
P23142	1152	364.382	-1.66062	Fibulin-1
Q96QK1	1214.75	382.81	-1.66596	Vacuolar protein sorting-associated protein 35
A0A024R592	903	284.092	-1.66837	Glucosidase, alpha neutral AB, isoform CRA_b
E9PBK7	180	56.5	-1.67167	Mitogen-activated protein kinase 3
A8K168	628	196.585	-1.67561	Malic enzyme
A8K3B0	2558.17	797.606	-1.68136	cDNA FLJ77877, highly similar to Human ENO2 neuron specific (gamma) enolase
B2R983	3958	1231.8	-1.684	cDNA, FLJ94267, highly similar to Homo sapiens glutathione S-transferase omega 1 (GSTO1), mRNA
P35606	808	251.125	-1.68595	Coatomer subunit beta&#039;
A0A024R7F1	440	136.667	-1.68684	Protein kinase C substrate 80K-H, isoform CRA_a
A0A087WZF1	451	138.645	-1.70173	Lipoma-preferred partner
A0A024RAJ5	333	102.333	-1.70225	Collagen, type IV, alpha 3 (Goodpasture antigen) binding protein, isoform CRA_a
P05543	388	117.333	-1.72544	Thyroxine-binding globulin
A0AUM2	548	165	-1.73171	FOLR2 protein (Fragment)
B3KRM8	1589	477	-1.73606	Translin, isoform CRA_b
I3L1N9	1315	393.667	-1.74002	CDGSH iron-sulfur domain-containing protein 2
A0A0A0MTN3	346.5	103.703	-1.7404	Glutathione S-transferase Mu 3
P35527	1448	431.328	-1.7472	Keratin, type I cytoskeletal 9
P01781	628	187	-1.74773	Ig heavy chain V-III region GAL
B2R7N6	881	262.207	-1.74843	Amino acid transporter
B2R959	197	58.5	-1.75169	cDNA, FLJ94229, highly similar to Homo sapiens heterogeneous nuclear ribonucleoprotein L (HNRPL),mRNA
A0A024RAG6	218.5	64.415	-1.76216	Complement component 1, q subcomponent, A chain, isoform CRA_a
A0A024R1S8	3984.67	1173.45	-1.7637	LIM and SH3 protein 1, isoform CRA_b
Q7Z4Y8	2703	795.5	-1.76463	ATP synthase subunit g 2, mitochondrial
O94919	1117	328.375	-1.76621	Endonuclease domain-containing 1 protein
A0A024R814	1495	438.667	-1.76895	Ribosomal protein L7, isoform CRA_a
A0A0A0MTR1	1372	401.894	-1.77139	Cadherin-13
Q5JQ44	735	215.1	-1.77274	Putative uncharacterized protein DKFZp547A0616 (Fragment)
Q75L23	784	229	-1.77551	Putative uncharacterized protein PSMC2 (Fragment)
Q9UBG0	1535.5	447.75	-1.77794	C-type mannose receptor 2
A0A024RCN6	195.5	56.6667	-1.7866	Valyl-tRNA synthetase, isoform CRA_a
B7Z556	537	155.25	-1.79033	cDNA FLJ56822, highly similar to Alpha-2-HS-glycoprotein
A4D105	395	114	-1.79282	Replication protein A3, 14kDa
A0A024RB22	461	132.667	-1.79696	SWI/SNF related, matrix associated, actin dependent regulator of chromatin, subfamily c, member 2, isoform CRA_a
A8KAK1	801	228.934	-1.80687	cDNA FLJ77398, highly similar to Homo sapiens UDP-glucose ceramide glucosyltransferase-like 1, transcript variant 2, mRNA
A0A096LNZ9	197	56.1667	-1.81041	Ubiquitin-like protein ISG15 (Fragment)
Q6FHG6	851	240.452	-1.82341	PRELP protein (Fragment)
Q99714	406	114.014	-1.83227	3-hydroxyacyl-CoA dehydrogenase type-2
A2MYC8	659	184.667	-1.83535	V5-2 protein (Fragment)
A0A024R7G6	923	255.75	-1.8516	Epidermal growth factor receptor pathway substrate 15-like 1, isoform CRA_a
G1UI17	334.5	91.835	-1.86489	Glycogen debranching enzyme (Fragment)
P35580	3622	989.28	-1.87234	Myosin-10
A8K4U4	208	56.5	-1.88026	cDNA FLJ77113
O95219	211	57	-1.88821	Sorting nexin-4
B4DPJ2	2685.67	713.704	-1.91188	Annexin
H3BM42	794	207.11	-1.93874	Golgi apparatus protein 1
B4DPW5	2568	659.293	-1.96165	cDNA FLJ59374, highly similar to Homo sapiens caldesmon 1 (CALD1), transcript variant 2, mRNA
B4DNG0	836	213.333	-1.97039	Olfactomedin-like protein 3
A0A087WW66	430	109.333	-1.97561	26S proteasome non-ATPase regulatory subunit 1
O75396	1731	440.027	-1.97594	Vesicle-trafficking protein SEC22b
A0A0G2JMS7	256	64.4433	-1.99004	Protein scribble homolog
A0A087X2I1	773	193.525	-1.99795	26S protease regulatory subunit 10B
Q59EQ1	478	119.5	-2	Cadherin 11, type 2 isoform 1 preproprotein variant (Fragment)
A0A024R1Z6	242.5	59	-2.0392	Vesicle amine transport protein 1 homolog (T californica), isoform CRA_a
A0A024RD41	3012	731.667	-2.04146	RAB23, member RAS oncogene family, isoform CRA_a
A0A024R6P0	2748	666.416	-2.04389	Serpin peptidase inhibitor, clade A (Alpha-1 antiproteinase, antitrypsin), member 3, isoform CRA_c
A0A087WU08	2574	619.875	-2.05396	Haptoglobin
B0QY01	225	54.125	-2.05556	Target of Myb protein 1 (Fragment)
A0A024RAX0	676	162.25	-2.0588	Matrix Gla protein
B0QZ18	3015	723.296	-2.0595	Copine-1
A0M8W4	902	207.5	-2.12002	Ubiquitin-conjugating enzyme E2 variant 2
B2ZZ89	884	202.512	-2.12604	Epididymis luminal protein 102
B7Z9B7	1412	322.75	-2.12925	cDNA FLJ54732, moderately similar to Sorbin and SH3 domain-containing protein 1
C9JAK5	1520	346.7	-2.13231	ADP-ribosylation factor 4
B4E2F9	1999.32	455.736	-2.13324	cDNA FLJ57038, highly similar to Filamin-A
K7EQQ3	6367	1439.5	-2.14505	Keratin, type I cytoskeletal 9
A0A075B6G3	818.5	183.577	-2.1566	Dystrophin
Q8IWB1	194	43.5	-2.15697	Inositol 1,4,5-trisphosphate receptor-interacting protein
Q9Y217	430	96.3333	-2.15823	Myotubularin-related protein 6
Q9BVK6	267	59.75	-2.15983	Transmembrane emp24 domain-containing protein 9
B4DTX5	1412	314.816	-2.16516	cDNA FLJ60072, highly similar to Homo sapiens sorbin and SH3 domain containing 1 (SORBS1), transcript variant 6, mRNA
A0A087WUN8	371	82	-2.17772	Syntaxin-binding protein 2
A0A024R3W7	239	52.5	-2.18662	Eukaryotic translation elongation factor 1 beta 2, isoform CRA_a
B4DDS8	846	184.5	-2.19704	cDNA FLJ56686, moderately similar to FADD protein
A0A024R7Z5	412.5	89.2075	-2.20916	Syndecan binding protein (Syntenin), isoform CRA_c
A8K9M5	1651.17	354.448	-2.21984	cDNA FLJ77947, highly similar to Human complement protein C8 beta subunit mRNA
A0A024R930	232	49.75	-2.22136	Proteoglycan 4, isoform CRA_a
B7Z539	898	192.05	-2.22523	cDNA FLJ56954, highly similar to Inter-alpha-trypsin inhibitor heavy chain H1
A0A075B6N8	6872.24	1450.32	-2.24441	Ig gamma-3 chain C region (Fragment)
A0A024R1N1	1066	224.5	-2.24742	Myosin, heavy polypeptide 9, non-muscle, isoform CRA_a
Q6MZU6	6876.26	1445.53	-2.25002	Putative uncharacterized protein DKFZp686C15213
B4DPU3	7412	1556.5	-2.25156	cDNA FLJ56548, highly similar to Elongation factor 2
B2R5H0	1174	245.915	-2.2552	Protein S100
A0A024RA21	843	170.8	-2.30322	Secernin 1, isoform CRA_a
A6NNI4	571	114.333	-2.32024	Tetraspanin
A0A0C4DFX3	829	164.667	-2.33182	EMILIN-1
P63267	1432	283.667	-2.33576	Actin, gamma-enteric smooth muscle
F6U211	253	49.4667	-2.35461	40S ribosomal protein S10
P07204	989	190.33	-2.37747	Thrombomodulin
A6NLN1	652	123.917	-2.39549	Polypyrimidine tract binding protein 1, isoform CRA_b
A0A024RB01	2564	484.4	-2.40413	Integrin, alpha 5 (Fibronectin receptor, alpha polypeptide), isoform CRA_b
Q6MZV6	2675.38	500.17	-2.41925	Putative uncharacterized protein DKFZp686L19235
A0A024RDY2	860	158.994	-2.43536	Tumor protein, translationally-controlled 1, isoform CRA_a
A8K4C8	5080	925.667	-2.45626	60S ribosomal protein L13
V9HWF2	1684.5	306.817	-2.45687	Malate dehydrogenase
Q96CD0	228.5	41	-2.4785	F-box/LRR-repeat protein 8
B4DEA3	218	37	-2.55873	cDNA FLJ56531, highly similar to UV excision repair protein RAD23 homolog B
Q96K68	2872.08	483.564	-2.57032	cDNA FLJ14473 fis, clone MAMMA1001080, highly similar to Homo sapiens SNC73 protein (SNC73) mRNA
Q9NPP6	3076.09	515.486	-2.57709	Immunoglobulin heavy chain variant (Fragment)
Q8NCL6	2879.25	479.72	-2.58543	cDNA FLJ90170 fis, clone MAMMA1000370, highly similar to Ig alpha-1 chain C region
V9HW34	9283.64	1502.04	-2.62777	Epididymis luminal protein 213
A0A087WWT3	646	104	-2.63495	Serum albumin
A0A087X130	12702.6	2022.84	-2.65067	Ig kappa chain C region
Q6P5S8	14216	2252.75	-2.65776	IGK@ protein
P27824	1292.5	204.5	-2.65999	Calnexin
Q6PJF2	9283.64	1452.93	-2.67573	IGK@ protein
Q6GMX0	11199.1	1698.37	-2.72116	Uncharacterized protein
A0A087WYL9	14216	2132.92	-2.73661	Ig kappa chain C region
S6C4R6	12602.9	1884.59	-2.74143	IgG L chain
A8K3B6	406	60.5	-2.74647	Non-specific protein-tyrosine kinase
B4E3A8	1457	216.333	-2.75167	cDNA FLJ53963, highly similar to Leukocyte elastase inhibitor
A0A087WUS7	2422	354.7	-2.77153	Ig delta chain C region
A0A087WZW8	14216	2052.32	-2.79219	Protein IGKV3-11
B4DNM8	360	51.75	-2.79837	cDNA FLJ53395, highly similar to Prolyl 3-hydroxylase 1 (EC 1.14.11.7)
P49327	1231.5	174.842	-2.81629	Fatty acid synthase
V9HWK1	2754	387.942	-2.82761	Triosephosphate isomerase
B4DQX8	3990	547.875	-2.86447	cDNA FLJ51723, highly similar to DCC-interacting protein 13 alpha (Fragment)
O76024	2314	313	-2.88615	Wolframin
A0A024RAC9	253	34	-2.89553	Zinc finger, UBR1 type 1, isoform CRA_c
Q8TCD0	14216	1858.35	-2.93542	Uncharacterized protein
A0A024RDE1	1252	161.95	-2.95061	SPARC-like 1 (Mast9, hevin), isoform CRA_a
A0A024RC65	4177	531.732	-2.9737	HCG1991735, isoform CRA_a
B4DRV4	2956	340.5	-3.11792	cDNA FLJ55667, highly similar to Secreted protein acidic and rich in cysteine
A0A0B4J1R6	1682.75	191.546	-3.13506	Transketolase
Q6UVK1	1875	210.564	-3.15456	Chondroitin sulfate proteoglycan 4
A0A024QZV0	1431	160.625	-3.15526	HCG1811539, isoform CRA_b
P12235	1117	125.333	-3.15579	ADP/ATP translocase 1
B4DQG5	2126.25	227.918	-3.22173	cDNA FLJ54122, highly similar to Cytosol aminopeptidase (EC 3.4.11.1)
D6RA82	5307.67	564.375	-3.23335	Annexin
B4DKT9	4013	422.167	-3.2488	cDNA FLJ54052, highly similar to Alpha-1 catenin (Cadherin-associated protein)
O94832	1636	170.944	-3.25858	Unconventional myosin-Id
P01023	3824.29	397.764	-3.26521	Alpha-2-macroglobulin
B2R6V9	1398	142	-3.2994	cDNA, FLJ93141, highly similar to Homo sapiens coagulation factor XIII, A1 polypeptide (F13A1), mRNA
A8MX94	5754.4	581.104	-3.3078	Glutathione S-transferase P
P26006	4296	414.25	-3.37442	Integrin alpha-3/beta-1
F2ZC06	3779.75	349.452	-3.43512	Thyroid hormone receptor interacting protein 6 isoform 1
Q9NZU5	5750	529.346	-3.44128	LIM and cysteine-rich domains protein 1
A0A024R0S6	5116.29	460.624	-3.47344	EH-domain containing 2, isoform CRA_a
P43652	2496.5	211.875	-3.55862	Afamin
A8K3Q7	19376	1632.3	-3.56929	Annexin
Q96C32	9160.43	752.563	-3.60553	Polyubiquitin-C
B0YJ88	4307	350.696	-3.61839	Radixin
A0A0G2JPD4	6460.29	505.912	-3.67464	Uncharacterized protein
A0A024R9G4	1679	122.667	-3.77479	Family with sequence similarity 49, member B, isoform CRA_a
A0A087X2C0	5633	410.31	-3.77912	Ig mu chain C region
A0A024R971	5098	368.058	-3.79193	Fibromodulin, isoform CRA_a
Q92626	2750	187.25	-3.87639	Peroxidasin homolog
V9HW68	19889.1	1004.38	-4.30761	Epididymis luminal protein 214
Q6N089	19877.1	909.564	-4.44979	Putative uncharacterized protein DKFZp686P15220
Q6MZQ6	21830.2	939.36	-4.5385	Putative uncharacterized protein DKFZp686G11190
Q6GMX6	24204.1	1024.25	-4.56262	IGH@ protein
H3BQZ7	2286.5	69.3333	-5.04345	HCG2044799
