# Supplementary material for: TMT-Based Quantitative Proteomic Analysis Identification of Integrin Alpha 3 and Integrin Alpha 5 as Novel Biomarkers in Pathogenesis of Acute Aortic Dissection
Source: Biomed Res Int. 2020 Jul 2;2020:1068402. doi: 10.1155/2020/1068402 (PMC7441460; doi:10.1155/2020/1068402)
Supplement: Supplementary 3 — Supplementary Table 3 Basic data between AAD patients and healthy controls in immunohistochemistry. Note: a“0” is no; “1” is yes. bAccording to the more popular Stanford system, dissections involving the ascending aorta are classified as type A, whereas those involving only the descending aorta are classified as type B. [file 1068402.f3.xlsx]

## Sheet: Sheet1
Supplementary Table 3|
Characteristics	Health 2	Health 3	Health 4	Health 5	Health 6	Health 7	Health 8	Health 9	Health 10	Health 11	patient 6	patient 7	patient 8	patient 9	patient 10	patient 11	patient 12	patient 13	patient 14	patient 15	patient 16	patient 17	patient 18	patient 19	patient 20	patient 21	patient 22	patient 23	patient 24	patient 25
Age	45	23	40	39	49	50	55	50	59	51	37	66	49	23	62	63	58	54	40	52	54	24	40	29	62	32	59	66	47	52
Gender	male	male	female	female	male	male	male	male	male	male	male	female	male	female	male	male	female	male	male	male	male	female	male	female	female	male	male	female	female	male
AADa	0	0	0	0	0	0	0	0	0	0	1	1	1	1	1	1	1	1	1	1	1	1	1	1	1	1	1	1	1	1
Standfordb											A	A	A	A	A	A	A	A	A	A	B	A	A	A	A	A	A	A	A	A
Marfan syndromea											1	0	0	1	0	0	0	0	0	0	0	0	0	0	0	0	0	0	0	0
Hypertensiona	0	0	0	0	0	0	0	0	1	0	0	1	1	0	0	1	1	1	0	1	1	0	1	1	1	0	1	1	0	0
